# Supplementary material for: Lewis basic site (LBS)-functionalized zeolite-like supramolecular assemblies (ZSAs) with high CO2 uptake performance and highly selective CO2/CH4 separation
Source: Royal Society of Chemistry journal article supplement (doi:10.1039/c7ta06003c), 2017-01-01
Supplement: c7ta06003c1.pdf [file c7ta06003c1.pdf]

## Electronic Supplementary Information (ESI)

### **Lewis Basic Sites (LBSs) functionalized zeolite-like supramolecular assemblies (ZSAs) with high performance of CO<sub>2</sub> sorption and highly selective CO<sub>2</sub>/CH<sub>4</sub> separation**

Jiantang Li, Cong Dai, Yu Cao, Xiaodong Sun, Guanghua Li, Qisheng Huo and Yunling Liu\*

*State Key Laboratory of Inorganic Synthesis and Preparative Chemistry, College of Chemistry, Jilin University, Changchun 130012, P. R. China.*

*\*E-mail: yunling@jlu.edu.cn; Fax: +86-431-85168624; Tel: +86-431-85168614*

## S1. Calculation procedures of selectivity from IAST

The measured experimental data is excess loadings ( $q^{ex}$ ) of the pure components CO<sub>2</sub>, CH<sub>4</sub>, C<sub>2</sub>H<sub>6</sub> and C<sub>3</sub>H<sub>8</sub> for **ZSA-7**, **ZSA-8** and **ZSA-9**, which should be converted to absolute loadings ( $q$ ) firstly.

$$q = q^{ex} + \frac{pV_{pore}}{ZRT}$$

Here  $Z$  is the compressibility factor. The Peng-Robinson equation was used to estimate the value of compressibility factor to obtain the absolute loading, while the measure pore volume is also necessary.

The dual-site Langmuir-Freundlich equation is used for fitting the isotherm data at 298 K.

$$q = q_{m_1} \times \frac{b_1 \times p^{1/n_1}}{1 + b_1 \times p^{1/n_1}} + q_{m_2} \times \frac{b_2 \times p^{1/n_2}}{1 + b_2 \times p^{1/n_2}}$$

Here  $p$  is the pressure of the bulk gas at equilibrium with the adsorbed phase (kPa),  $q$  is the adsorbed amount per mass of adsorbent (mol/kg),  $q_{m_1}$  and  $q_{m_2}$  are the saturation capacities of sites 1 and 2 (mol/kg),  $b_1$  and  $b_2$  are the affinity coefficients of sites 1 and 2 (1/kPa),  $n_1$  and  $n_2$  are the deviations from an ideal homogeneous surface.

The selectivity of preferential adsorption of component 1 over component 2 in a mixture containing 1 and 2, perhaps in the presence of other components too, can be formally defined as

$$S = \frac{q_1/q_2}{p_1/p_2}$$

$q_1$  and  $q_2$  are the absolute component loadings of the adsorbed phase in the mixture. These component loadings are also termed the uptake capacities. We calculate the values of  $q_1$  and  $q_2$  using the Ideal Adsorbed Solution Theory (IAST) of Myers and Prausnitz.

## S2. Supporting Figures

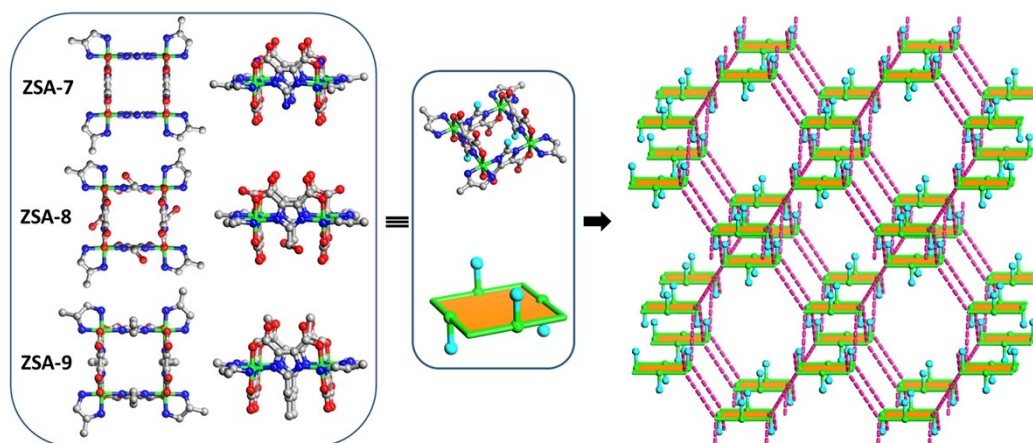

**Fig. S1.** Ball-and-stick and schematic representations of the substituents' orientation.

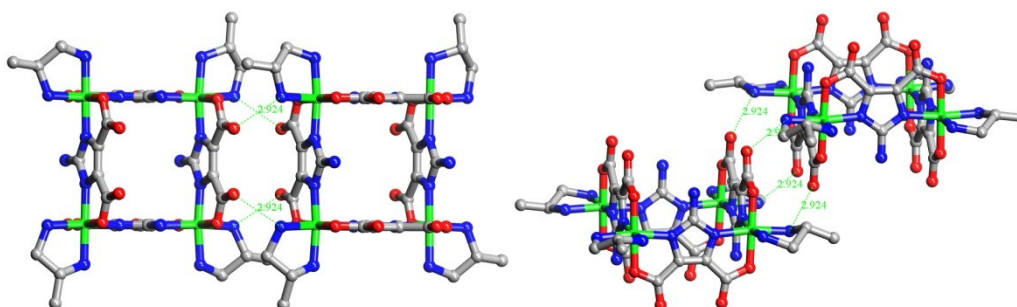

**Fig. S2.** Different direction views of four intermolecular N-H $\cdots$ O hydrogen bonds (2.924 Å) linking the vertices of two neighboring squares in **ZSA-7**.

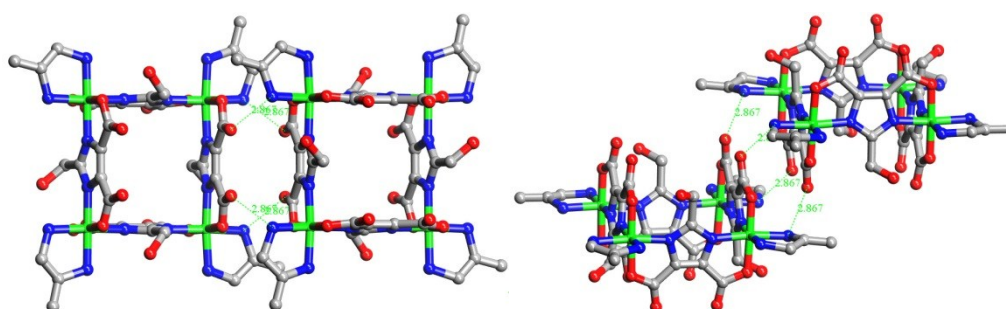

**Fig. S3.** Different direction views of four intermolecular N-H $\cdots$ O hydrogen bonds (2.867 Å) linking the vertices of two neighboring squares in **ZSA-8**.

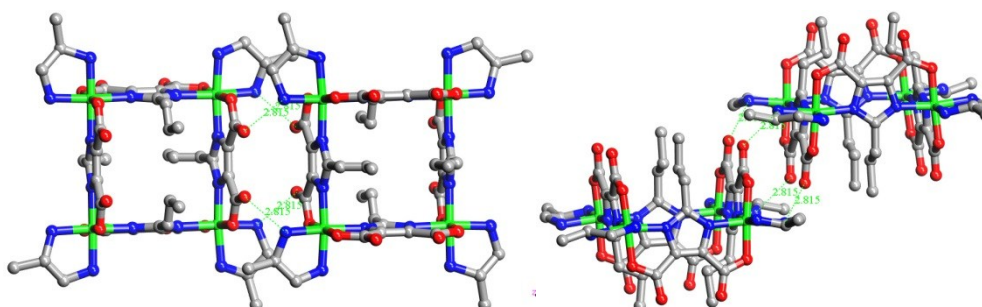

**Fig. S4.** Different direction views of four intermolecular N-H $\cdots$ O hydrogen bonds (2.815 Å) linking the vertices of two neighboring squares in **ZSA-9**.

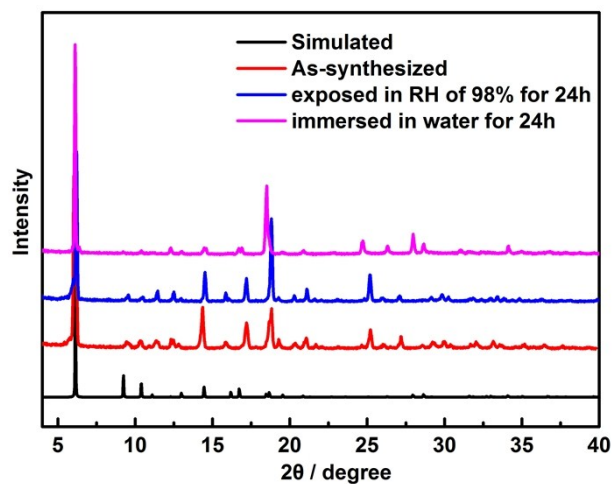

**Fig. S5.** PXRD patterns of **ZSA-7** for simulated, experimental samples, exposed in RH of 98% and immersed in water. The differences in reflection intensity are probably due to preferred orientations in the powder sample.

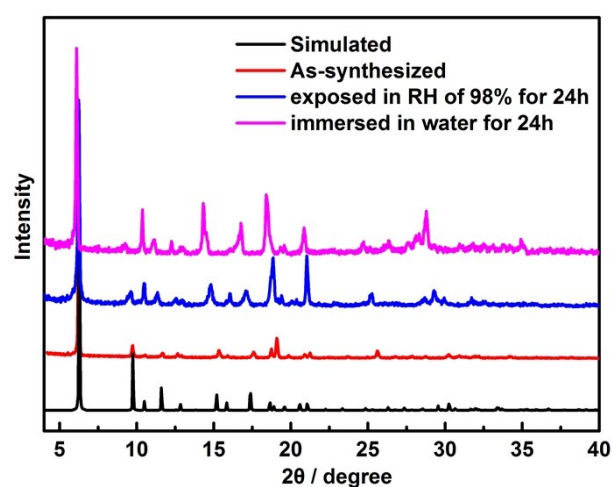

**Fig. S6.** PXRD patterns of **ZSA-8** for simulated, experimental samples, exposed in RH of 98% and immersed in water. The differences in reflection intensity are probably due to preferred orientations in the powder sample.

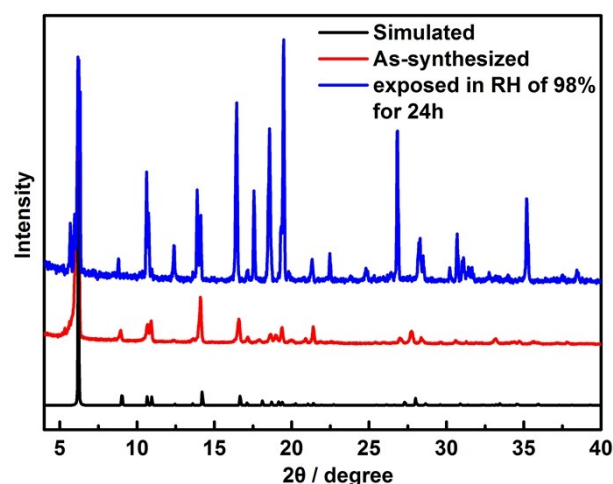

**Fig. S7.** PXRD patterns of **ZSA-9** for simulated, experimental samples and exposed in RH of 98%. The differences in reflection intensity are probably due to preferred orientations in the powder sample.

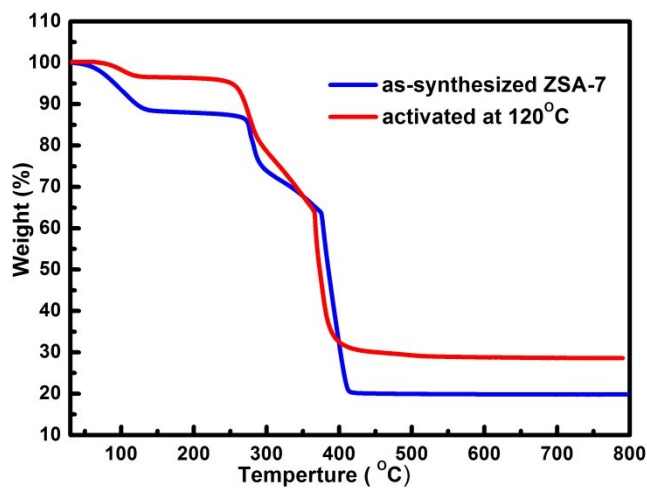

Fig. S8. Thermogravimetric analysis curves of **ZSA-7** for the as-synthesized and activated samples.

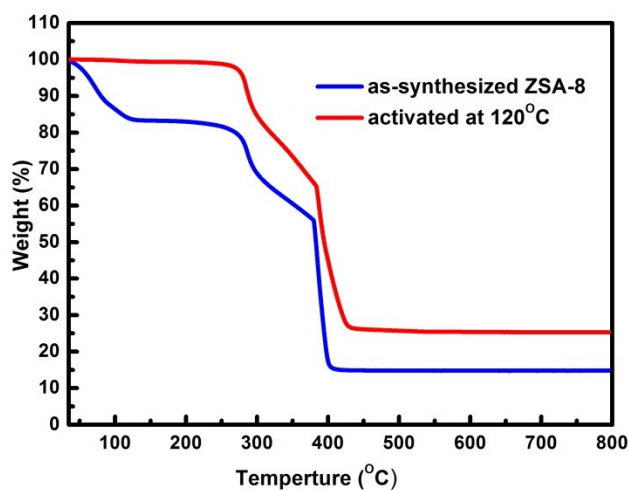

Fig. S9. Thermogravimetric analysis curves of **ZSA-8** for the as-synthesized and activated samples.

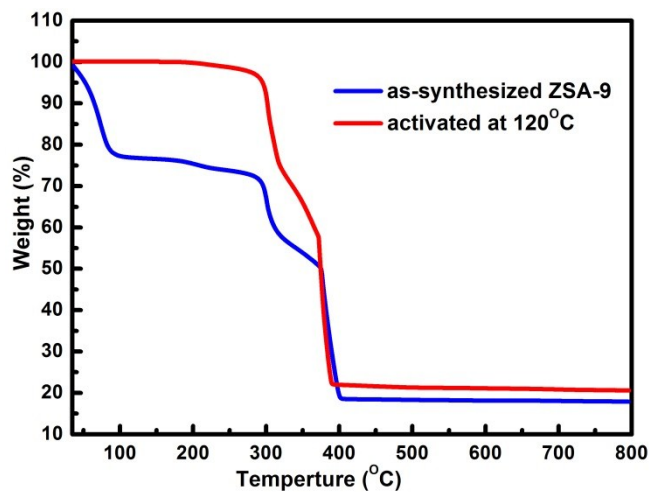

Fig. S10. Thermogravimetric analysis curves of **ZSA-9** for the as-synthesized and activated samples.

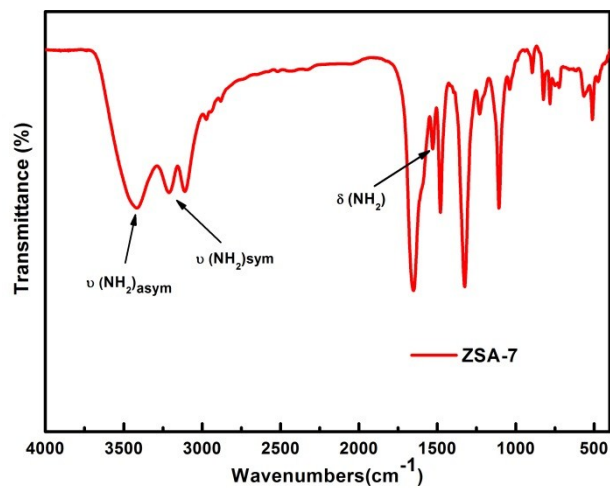

Fig. S11. FT-IR spectrum of **ZSA-7**.

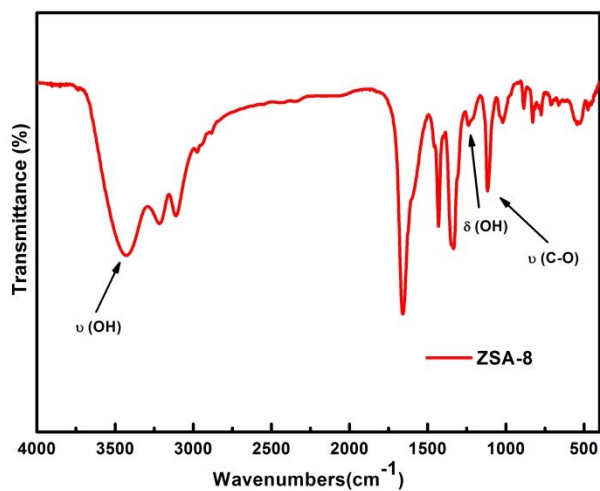

Fig. S12. FT-IR spectrum of **ZSA-8**.

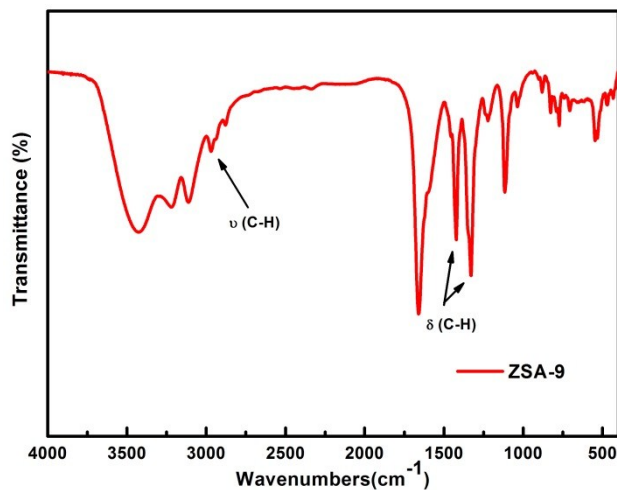

Fig. S13. FT-IR spectrum of **ZSA-9**.

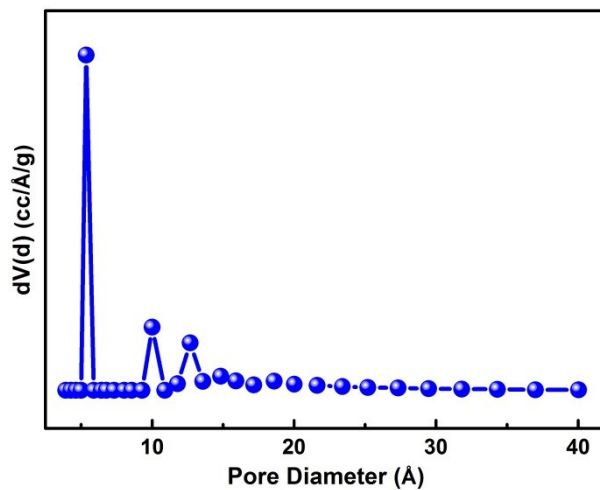

**Fig. S14.** The pore size distribution of **ZSA-7** calculated using the DFT method.

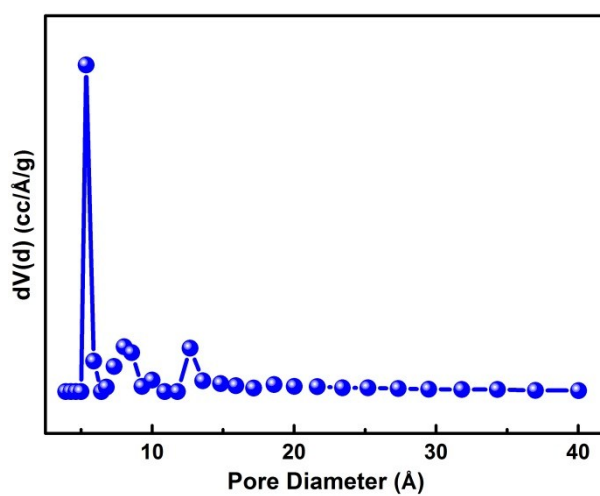

**Fig. S15.** The pore size distribution of **ZSA-8** calculated using the DFT method.

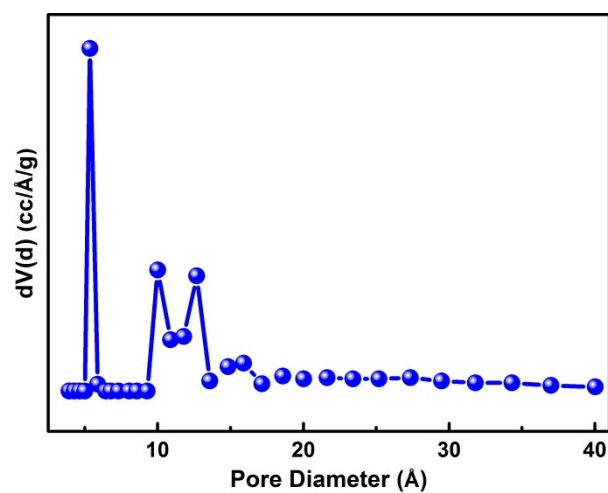

**Fig. S16.** The pore size distribution of **ZSA-9** calculated using the DFT method.



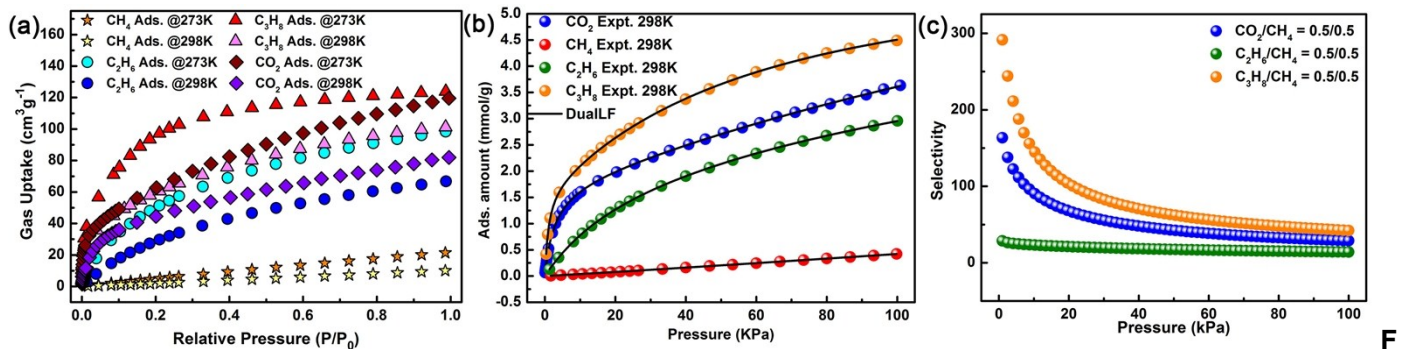

**Fig. S17.** (a) Gas sorption isotherms for **ZSA-1**; (b) gas sorption isotherms of  $\text{CO}_2$ ,  $\text{CH}_4$ ,  $\text{C}_2\text{H}_6$  and  $\text{C}_3\text{H}_8$  along with the dual-site Langmuir–Freundlich (DSLFF) fits for **ZSA-1**; (c) gas mixture adsorption selectivities for **ZSA-1** predicted by IAST at 298 K under 1 bar.

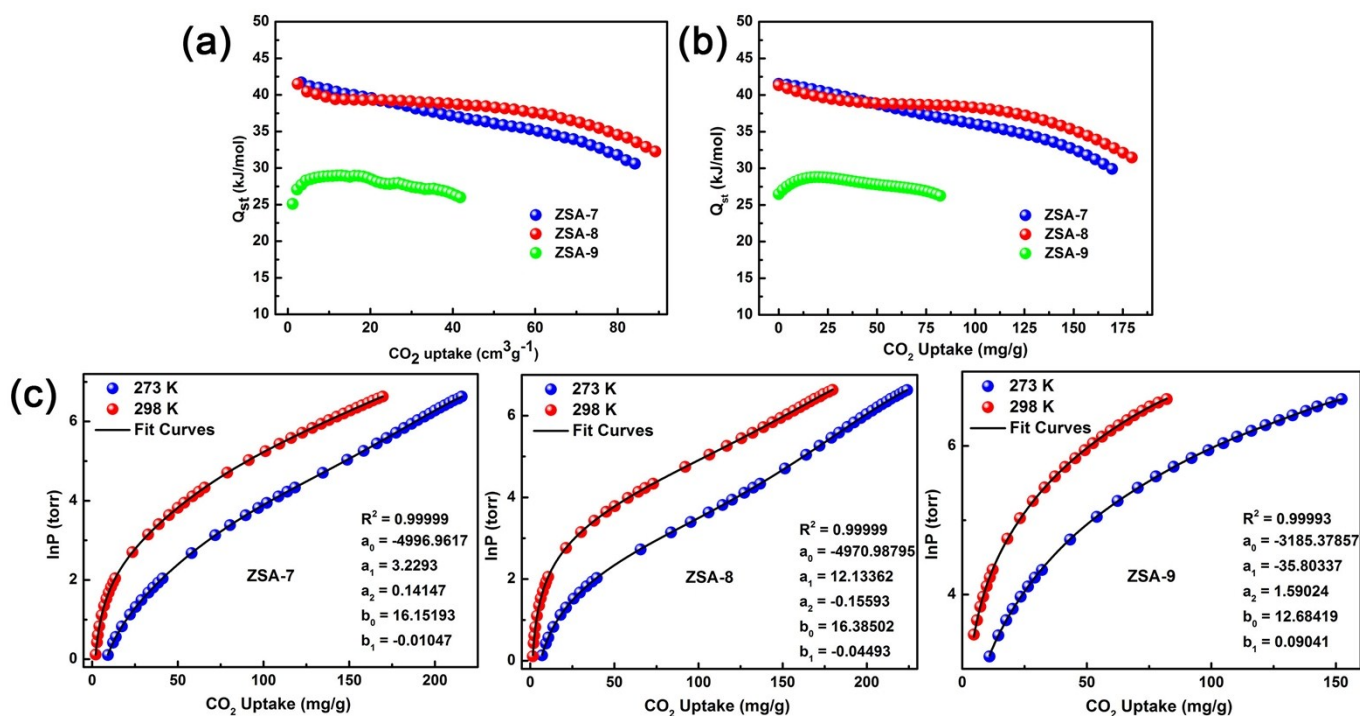

**Fig. S18.**  $Q_{st}$  of  $\text{CO}_2$  for **ZSA-7**, **ZSA-8** and **ZSA-9**. (a) calculated by MicroActive soft; (b) calculated with virial method; (c) nonlinear curves fitting of  $\text{CO}_2$ .

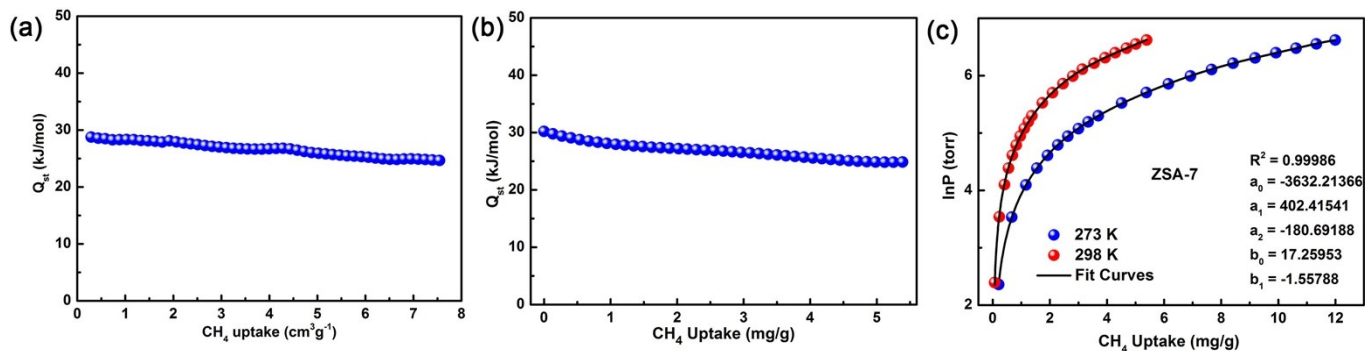

**Fig. S19.**  $Q_{st}$  of  $\text{CH}_4$  for **ZSA-7**. (a) calculated by MicroActive soft; (b) calculated with virial method; (c) nonlinear curves fitting of  $\text{CH}_4$ .



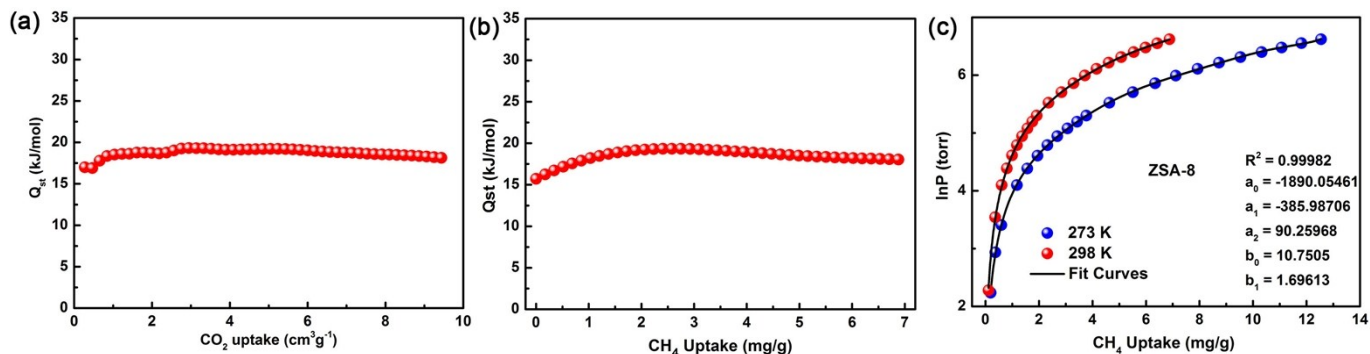

**Fig. S20.**  $Q_{st}$  of  $CH_4$  for ZSA-8. (a) calculated by MicroActive soft; (b) calculated with virial method; (c) nonlinear curves fitting of  $CH_4$ .

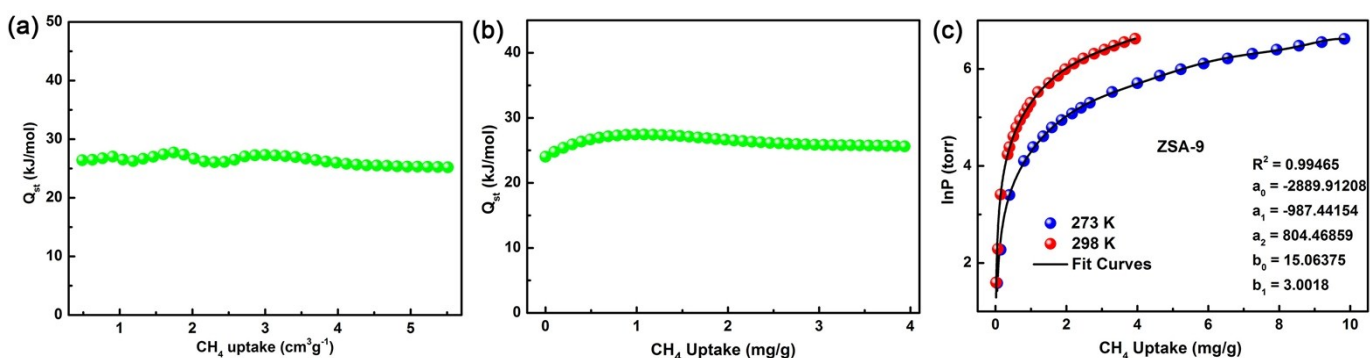

**Fig. S21.**  $Q_{st}$  of  $CH_4$  for ZSA-9. (a) calculated by MicroActive soft; (b) calculated with virial method; (c) nonlinear curves fitting of  $CH_4$ .

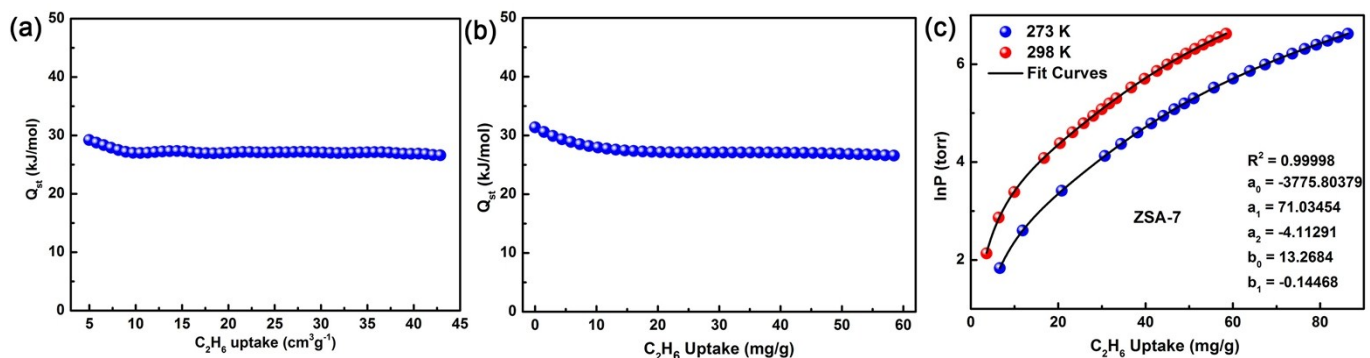

**Fig. S22.**  $Q_{st}$  of  $C_2H_6$  for ZSA-7. (a) calculated by MicroActive soft; (b) calculated with virial method; (c) nonlinear curves fitting of  $C_2H_6$ .

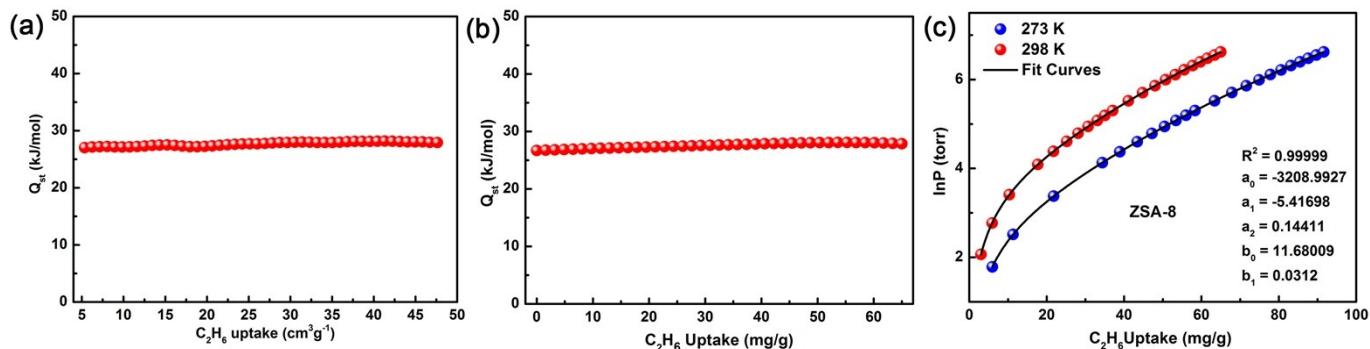

**Fig. S23.**  $Q_{st}$  of  $C_2H_6$  for **ZSA-8**. (a) calculated by MicroActive soft; (b) calculated with virial method; (c) nonlinear curves fitting of  $C_2H_6$ .

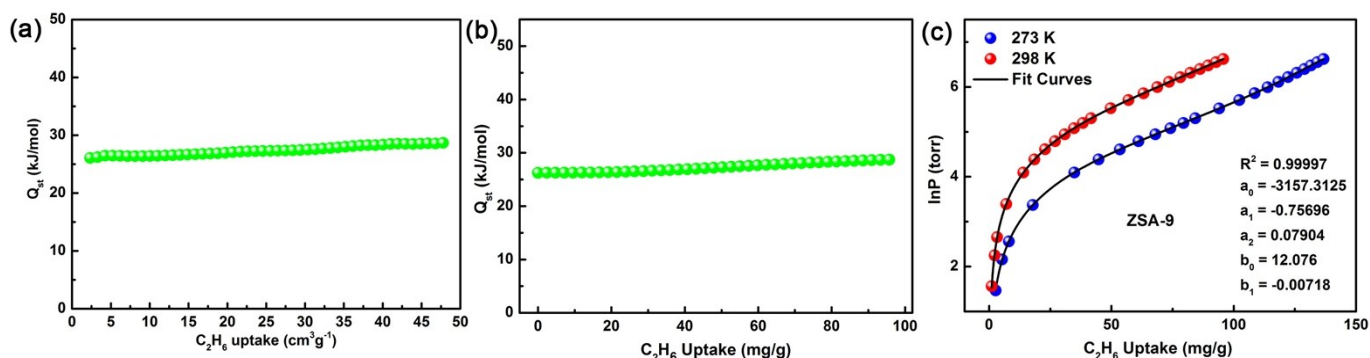

**Fig. S24.**  $Q_{st}$  of  $C_2H_6$  for **ZSA-9**. (a) calculated by MicroActive soft; (b) calculated with virial method; (c) nonlinear curves fitting of  $C_2H_6$ .

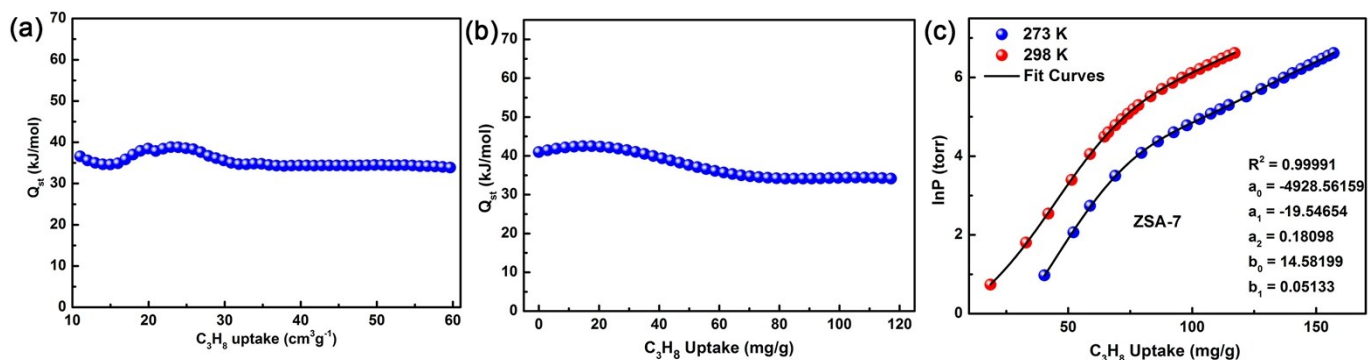

**Fig. S25.**  $Q_{st}$  of  $C_3H_8$  for **ZSA-7**. (a) calculated by MicroActive soft; (b) calculated with virial method; (c) nonlinear curves fitting of  $C_3H_8$ .

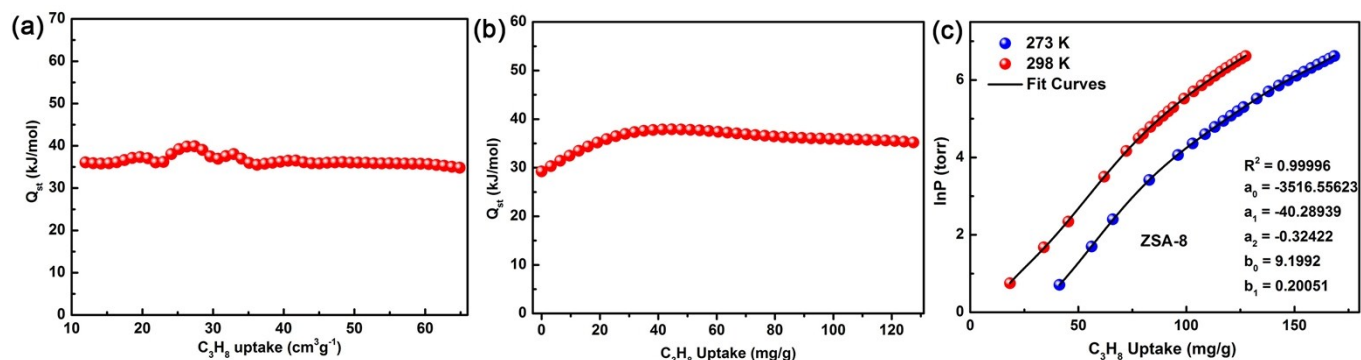

**Fig. S26.**  $Q_{st}$  of  $C_3H_8$  for **ZSA-8**. (a) calculated by MicroActive soft; (b) calculated with virial method; (c) nonlinear curves fitting of  $C_3H_8$ .

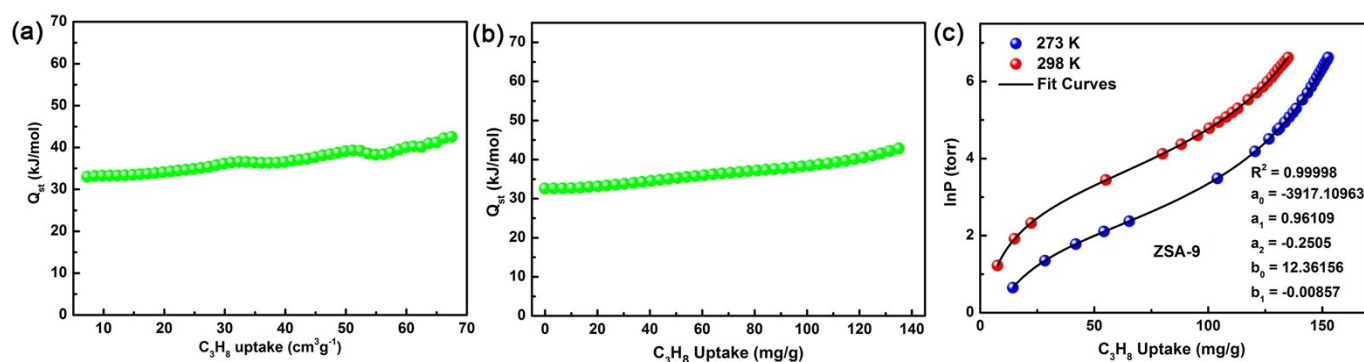

**Fig. S27.**  $Q_{st}$  of  $C_3H_8$  for **ZSA-9**. (a) calculated by MicroActive soft; (b) calculated with virial method; (c) nonlinear curves fitting of  $C_3H_8$ .

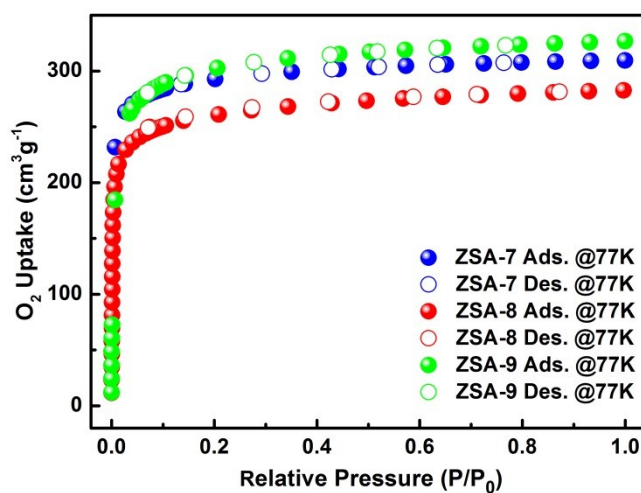

**Fig. S28.**  $O_2$  sorption isotherms for **ZSA-7** (blue), **ZSA-8** (red) and **ZSA-9** (green) at 77 K.

### S3. Supporting Tables

**Table S1.** Crystal data and structure refinements for **ZSA-7**, **ZSA-8** and **ZSA-9**.

| Compound                                                                    | ZSA-7                                                                           | ZSA-8                                                                           | ZSA-9                                                                           |
|-----------------------------------------------------------------------------|---------------------------------------------------------------------------------|---------------------------------------------------------------------------------|---------------------------------------------------------------------------------|
| Formula                                                                     | C <sub>32</sub> H <sub>64</sub> Co <sub>4</sub> N <sub>20</sub> O <sub>24</sub> | C <sub>36</sub> H <sub>68</sub> Co <sub>4</sub> N <sub>16</sub> O <sub>28</sub> | C <sub>44</sub> H <sub>86</sub> Co <sub>4</sub> N <sub>16</sub> O <sub>25</sub> |
| <i>Mw</i>                                                                   | 1347.75                                                                         | 1408.78                                                                         | 1475.01                                                                         |
| Temp (K)                                                                    | 296(2)                                                                          | 296(2)                                                                          | 296(2)                                                                          |
| Wavelength (Å)                                                              | 0.71073                                                                         | 0.71073                                                                         | 0.71073                                                                         |
| Crystal system                                                              | Tetragonal                                                                      | Tetragonal                                                                      | Tetragonal                                                                      |
| Space group                                                                 | I4(1)/amd                                                                       | I4(1)/amd                                                                       | I4(1)/amd                                                                       |
| <i>a</i> (Å)                                                                | 19.1419(2)                                                                      | 18.125(8)                                                                       | 19.597(4)                                                                       |
| <i>b</i> (Å)                                                                | 19.1419(2)                                                                      | 18.125(8)                                                                       | 19.597(4)                                                                       |
| <i>c</i> (Å)                                                                | 21.8929(3)                                                                      | 22.375(11)                                                                      | 20.713(5)                                                                       |
| <i>V</i> (Å <sup>3</sup> )                                                  | 8021.83(16)                                                                     | 7351(6)                                                                         | 7955(3)                                                                         |
| <i>Z</i> , <i>D<sub>C</sub></i> (Mg/m <sup>3</sup> )                        | 4, 1.117                                                                        | 4, 1.273                                                                        | 4, 1.232                                                                        |
| <i>F</i> (000)                                                              | 2784                                                                            | 2912                                                                            | 3080                                                                            |
| θ range (deg)                                                               | 1.41 - 25.37                                                                    | 1.45 - 25.03                                                                    | 1.43 - 25.07                                                                    |
| reflns collected/unique                                                     | 14119 / 1920                                                                    | 22744 / 1740                                                                    | 24932 / 1884                                                                    |
| <i>R<sub>int</sub></i>                                                      | 0.0583                                                                          | 0.0493                                                                          | 0.0646                                                                          |
| data/restraints/params                                                      | 1920 / 18 / 113                                                                 | 1740 / 52 / 122                                                                 | 1884 / 68 / 138                                                                 |
| GOF on <i>F</i> <sup>2</sup>                                                | 1.049                                                                           | 1.132                                                                           | 1.059                                                                           |
| <i>R</i> <sup>1</sup> , <i>wR</i> <sup>2</sup> ( <i>I</i> > 2σ( <i>I</i> )) | 0.0730, 0.2192                                                                  | 0.0755, 0.2691                                                                  | 0.0667, 0.2156                                                                  |
| <i>R</i> <sup>1</sup> , <i>wR</i> <sup>2</sup> (all data)                   | 0.1164, 0.2628                                                                  | 0.0957, 0.2999                                                                  | 0.0857, 0.2439                                                                  |

$${}^a R_1 = \sum ||F_o| - |F_c|| / \sum |F_o|, \quad {}^b wR_2 = [\sum w(|F_o|^2 - |F_c|^2) / \sum w(F_o^2)^2]^{1/2}$$

**Table S2.** Selected bond lengths [Å] and angles [°] for **ZSA-7**.

| <b>ZSA-7</b>        |           |                     |            |
|---------------------|-----------|---------------------|------------|
| Co(1)-O(1)          | 1.914(4)  | N(1)#1-Co(1)-N(3)   | 91.40(17)  |
| Co(1)-O(1)#1        | 1.914(4)  | N(1)-Co(1)-N(3)     | 171.65(17) |
| Co(1)-N(1)#1        | 1.924(4)  | O(1)-Co(1)-N(3)#1   | 92.17(17)  |
| Co(1)-N(1)          | 1.924(4)  | O(1)#1-Co(1)-N(3)#1 | 88.73(17)  |
| Co(1)-N(3)          | 1.930(5)  | N(1)#1-Co(1)-N(3)#1 | 171.65(18) |
| Co(1)-N(3)#1        | 1.930(5)  | N(1)-Co(1)-N(3)#1   | 91.40(17)  |
| O(1)-Co(1)-O(1)#1   | 178.8(2)  | N(3)-Co(1)-N(3)#1   | 85.5(3)    |
| O(1)-Co(1)-N(1)#1   | 95.54(15) | C(3)-O(1)-Co(1)     | 115.8(3)   |
| O(1)#1-Co(1)-N(1)#1 | 83.62(15) | C(1)-N(1)-Co(1)     | 140.5(4)   |
| O(1)-Co(1)-N(1)     | 83.62(15) | C(2)-N(1)-Co(1)     | 112.2(3)   |
| O(1)#1-Co(1)-N(1)   | 95.54(15) | C(4')-N(3)-Co(1)    | 111.2(8)   |
| N(1)#1-Co(1)-N(1)   | 92.6(2)   | C(4)-N(3)-Co(1)     | 109.0(6)   |
| O(1)-Co(1)-N(3)     | 88.73(17) | Co(1)-N(3)-H(3A)    | 109.9      |
| O(1)#1-Co(1)-N(3)   | 92.17(17) | Co(1)-N(3)-H(3B)    | 109.9      |

Symmetry transformations used to generate equivalent atoms:

#1 -y+3/4,-x+3/4,-z+1/4    #2 -x,y,z    #3 -x+1,y,z

**Table S3.** Selected bond lengths [Å] and angles [°] for **ZSA-8**.

| <b>ZSA-8</b>        |           |                     |           |
|---------------------|-----------|---------------------|-----------|
| Co(1)-O(1)#1        | 1.920(5)  | N(1)#1-Co(1)-N(2)   | 91.55(19) |
| Co(1)-O(1)          | 1.920(5)  | N(1)-Co(1)-N(2)     | 173.1(2)  |
| Co(1)-N(1)#1        | 1.936(5)  | O(1)#1-Co(1)-N(2)#1 | 89.6(2)   |
| Co(1)-N(1)          | 1.936(5)  | O(1)-Co(1)-N(2)#1   | 92.1(2)   |
| Co(1)-N(2)          | 1.952(6)  | N(1)#1-Co(1)-N(2)#1 | 173.1(2)  |
| Co(1)-N(2)#1        | 1.952(6)  | N(1)-Co(1)-N(2)#1   | 91.55(19) |
| O(1)#1-Co(1)-O(1)   | 177.7(3)  | N(2)-Co(1)-N(2)#1   | 85.8(3)   |
| O(1)#1-Co(1)-N(1)#1 | 84.16(17) | C(3)-O(1)-Co(1)     | 115.4(4)  |
| O(1)-Co(1)-N(1)#1   | 94.21(18) | C(1)-N(1)-Co(1)     | 141.4(4)  |
| O(1)#1-Co(1)-N(1)   | 94.21(18) | C(2)-N(1)-Co(1)     | 111.0(4)  |
| O(1)-Co(1)-N(1)     | 84.16(17) | C(5)-N(2)-Co(1)     | 112.7(11) |
| N(1)#1-Co(1)-N(1)   | 91.8(3)   | C(5')-N(2)-Co(1)    | 108.2(11) |
| O(1)#1-Co(1)-N(2)   | 92.1(2)   |                     |           |
| O(1)-Co(1)-N(2)     | 89.6(2)   |                     |           |

Symmetry transformations used to generate equivalent atoms:

#1 -y+3/4,-x+3/4,-z+1/4    #2 x,-y+1/2,z

**Table S4.** Selected bond lengths [Å] and angles [°] for **ZSA-9**.

| <b>ZSA-9</b>        |            |                     |            |
|---------------------|------------|---------------------|------------|
| Co(1)-O(1)#1        | 1.898(4)   | N(2)#1-Co(1)-N(1)   | 91.64(15)  |
| Co(1)-O(1)          | 1.898(4)   | N(2)-Co(1)-N(1)     | 170.82(16) |
| Co(1)-N(2)#1        | 1.933(4)   | O(1)#1-Co(1)-N(1)#1 | 84.12(13)  |
| Co(1)-N(2)          | 1.933(4)   | O(1)-Co(1)-N(1)#1   | 98.03(14)  |
| Co(1)-N(1)          | 1.944(4)   | N(2)#1-Co(1)-N(1)#1 | 170.82(16) |
| Co(1)-N(1)#1        | 1.944(4)   | N(2)-Co(1)-N(1)#1   | 91.64(15)  |
| O(1)#1-Co(1)-O(1)   | 176.93(18) | N(1)-Co(1)-N(1)#1   | 92.0(2)    |
| O(1)#1-Co(1)-N(2)#1 | 87.03(15)  | C(3)-O(1)-Co(1)     | 116.4(3)   |
| O(1)-Co(1)-N(2)#1   | 90.73(16)  | C(1)-N(1)-Co(1)     | 142.5(3)   |
| O(1)#1-Co(1)-N(2)   | 90.73(16)  | C(2)-N(1)-Co(1)     | 110.0(3)   |
| O(1)-Co(1)-N(2)     | 87.03(15)  | C(7')-N(2)-Co(1)    | 111.3(13)  |
| N(2)#1-Co(1)-N(2)   | 86.1(2)    | C(7)-N(2)-Co(1)     | 107.0(13)  |
| O(1)#1-Co(1)-N(1)   | 98.03(14)  |                     |            |
| O(1)-Co(1)-N(1)     | 84.12(13)  |                     |            |

Symmetry transformations used to generate equivalent atoms:

#1 -y+3/4,-x+3/4,-z+1/4 #2 x,-y+3/2,z

**Table S5.** The refined parameters for the Dual-site Langmuir-Freundlich equations fit for the pure isotherms of CO<sub>2</sub>, CH<sub>4</sub>, C<sub>2</sub>H<sub>6</sub> and C<sub>3</sub>H<sub>8</sub> for **ZSA-7**, **ZSA-8**, **ZSA-9** and **ZSA-1** at 298 K.

|              |                               | q <sub>m1</sub> | b <sub>1</sub> | 1/n <sub>1</sub> | q <sub>m2</sub> | b <sub>2</sub> | 1/n <sub>2</sub> | R <sup>2</sup> |
|--------------|-------------------------------|-----------------|----------------|------------------|-----------------|----------------|------------------|----------------|
| <b>ZSA-7</b> | CO <sub>2</sub>               | 1.62028         | 0.18442        | 1.0000           | 4.33212         | 0.01113        | 1.0000           | 0.99999        |
|              | CH <sub>4</sub>               | 8.66643         | 2.04698E-4     | 1.1256           | 0.0185          | 0.06986        | 0.91254          | 0.99992        |
|              | C <sub>2</sub> H <sub>6</sub> | 1.24389         | 0.07545        | 1.0265           | 5.35483         | 0.00193        | 0.9854           | 0.99997        |
|              | C <sub>3</sub> H <sub>8</sub> | 3.01407         | 0.00785        | 1.0214           | 1.24853         | 1.71999        | 0.99407          | 0.99985        |
| <b>ZSA-8</b> | CO <sub>2</sub>               | 3.48942         | 0.06797        | 1.0506           | 3.60923         | 0.00407        | 0.96242          | 0.99999        |
|              | CH <sub>4</sub>               | 158.10754       | 5.73758E-6     | 1.24945          | 0.25029         | 0.01698        | 0.89165          | 0.99996        |
|              | C <sub>2</sub> H <sub>6</sub> | 1.12333         | 0.05765        | 1.09318          | 4.24679         | 0.00842        | 0.81987          | 0.99999        |
|              | C <sub>3</sub> H <sub>8</sub> | 0.59315         | 2.83954        | 1.82462          | 6.66574         | 0.07638        | 0.41647          | 0.99998        |
| <b>ZSA-9</b> | CO <sub>2</sub>               | 0.79081         | 0.01741        | 1.27225          | 8.18131         | 5.18921E-4     | 1.24824          | 0.99985        |
|              | CH <sub>4</sub>               | 0.00374         | 0.82379        | 1.13353          | 39.18373        | 3.5596E-5      | 1.10377          | 0.99937        |
|              | C <sub>2</sub> H <sub>6</sub> | 0.02083         | 0.59471        | 1.02568          | 3.50526         | 0.00919        | 1.11512          | 0.99999        |
|              | C <sub>3</sub> H <sub>8</sub> | 1.58099         | 0.09979        | 0.72514          | 1.90671         | 0.13894        | 1.31713          | 0.99999        |
| <b>ZSA-1</b> | CO <sub>2</sub>               | 1.89567         | 0.34431        | 0.9584           | 7.0931          | 0.00169        | 1.14831          | 0.99993        |
|              | CH <sub>4</sub>               | 34.06727        | 9.27352E-5     | 1.06349          | 0.00318         | 0.11697        | 0.9856           | 0.99996        |
|              | C <sub>2</sub> H <sub>6</sub> | 6.9836          | 0.00687        | 0.84171          | 1.41368         | 0.03719        | 1.10988          | 0.99999        |
|              | C <sub>3</sub> H <sub>8</sub> | 4.29886         | 0.00939        | 1.14555          | 1.73448         | 0.93461        | 1.08672          | 0.99996        |
